# Supplementary material
Source: PubMed Central journal article supplement (PMC4303313)

## **Supplementary Figures**

### **Multivalency in the Inhibition of Oxidative Protein Folding by Arsenic (III)**

#### **Species**

Aparna Sapra, Danny Ramadan and Colin Thorpe\*

Department of Chemistry and Biochemistry, University of Delaware, Newark, Delaware 19716,

United States

**Figure S1: Reaction schemes for synthesizing multivalent arsenicals.** Panels A-C depict the synthetic schemes for BA-1, BA-2 and TA-1 respectively.

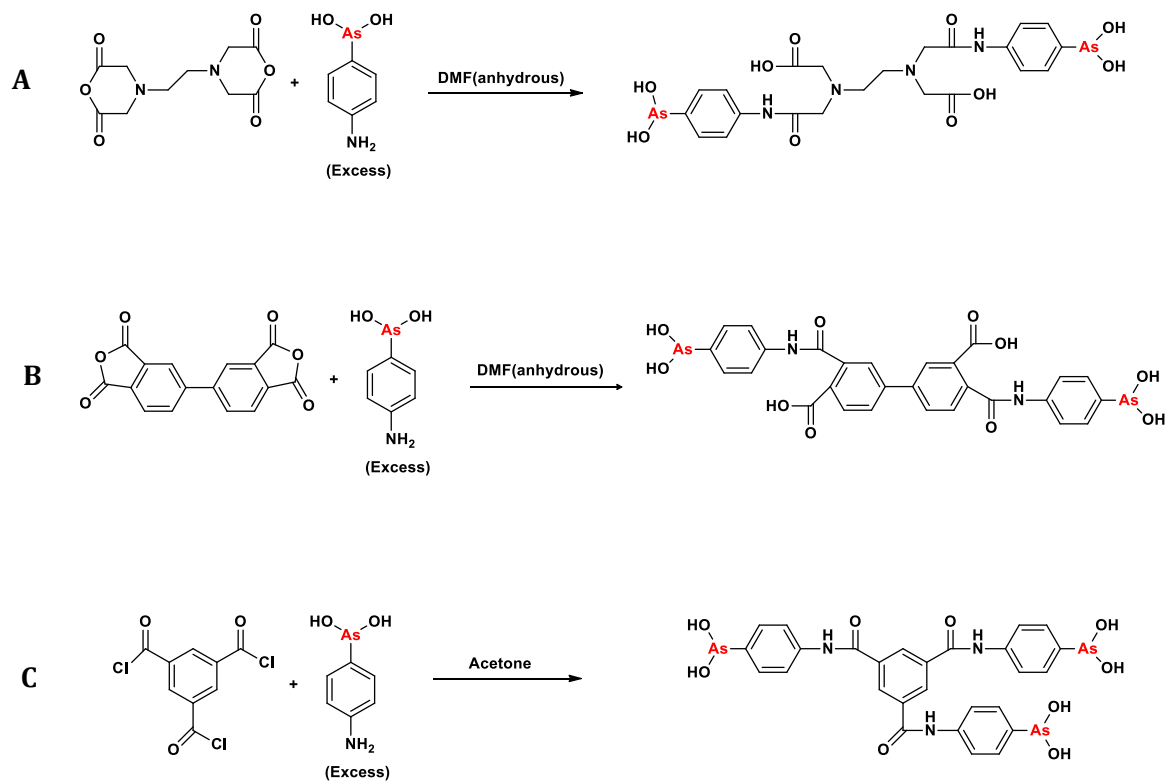

**Figure S2:** Arsenicals BA-1, BA-2 and TA-1 do not markedly delay the onset of light scattering following reduction of insulin by TCEP. Insulin (50  $\mu\text{M}$  in 50 mM phosphate buffer, pH 7.5, containing 1 mM EDTA) was mixed with 5 mM TCEP in presence of MVAs. The onset of turbidity was observed at 600 nm (panel A). The lag times are also presented as a bar graph in panel B with control (no arsenical), black; BA-1 (5  $\mu\text{M}$ ), pink; BA-2 (5  $\mu\text{M}$ ), blue; TA-1 (3.33  $\mu\text{M}$ ) green.

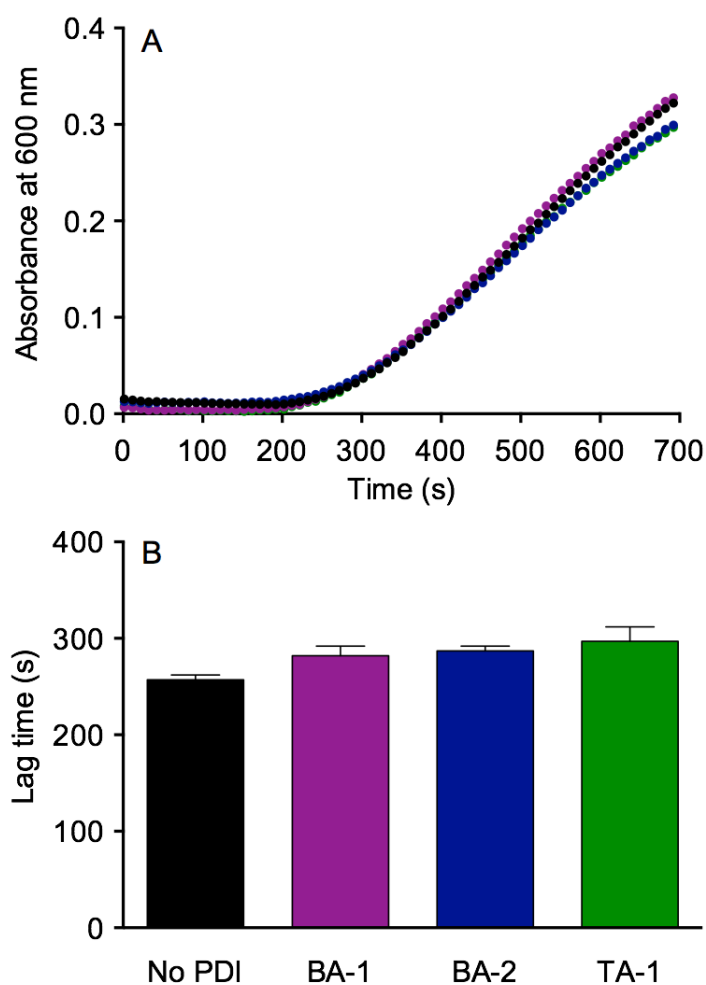

**Figure S3:** Spectrophotometric determination of the dissociation constant for the binding of BA-2 and TA-1 to reduced PDI. Panel A: The solid line for BA-2 binding to 1  $\mu\text{M}$  of reduced PDI was fit to a stoichiometry of  $1.0 \pm 0.11$  and a  $K_d$  of  $56 \text{ nM} \pm 36 \text{ nM}$  (see Methods). Panel B: The binding of TA-1 was fit to a stoichiometry of  $0.89 \pm 0.08$  and a  $K_d$  of  $100 \pm 32 \text{ nM}$ .

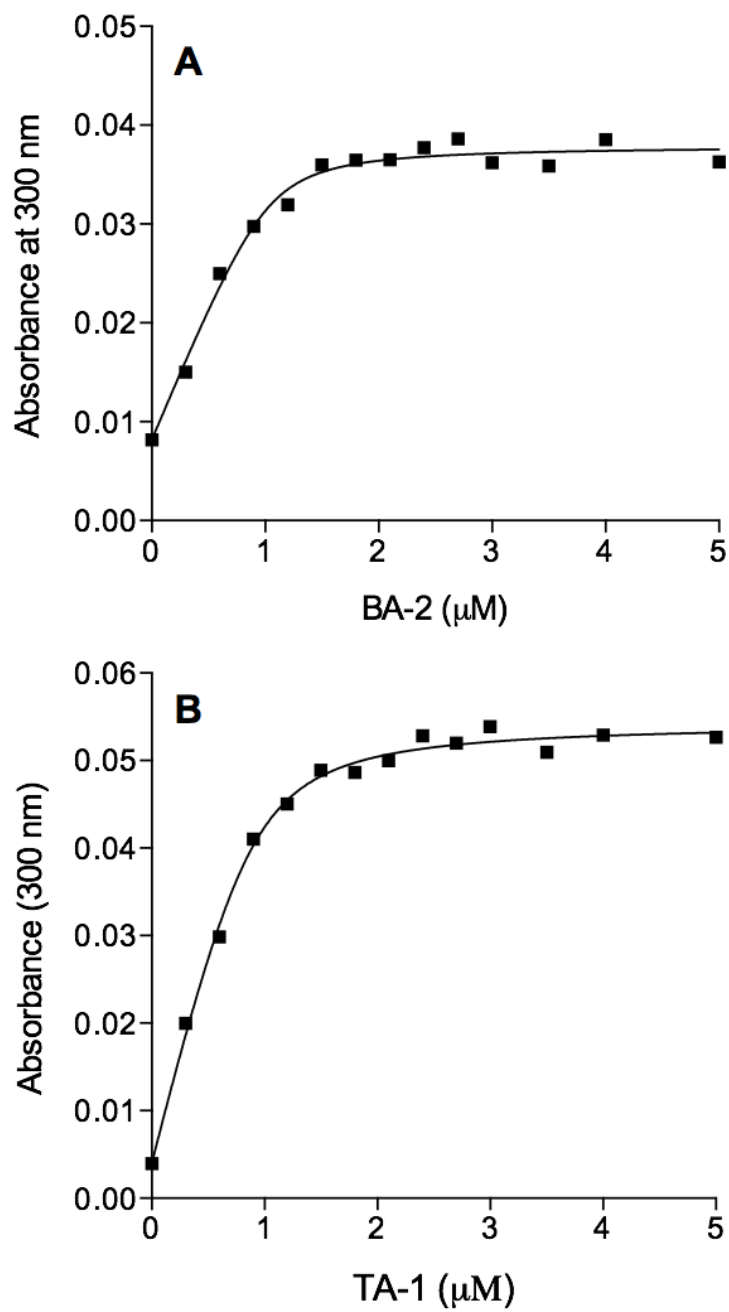

**Figure S4: Transmission electron microscopy of reduced RNase treated with multivalent arsenicals.** Reduced RNase (50  $\mu\text{M}$  in 50 mM potassium phosphate buffer, pH 7.5, containing 1 mM EDTA and 1 mM TCEP) was incubated with 5  $\mu\text{M}$  BA-1 (panel A), BA-2 (panel B) and 3.33  $\mu\text{M}$  of TA-1 (panel C) overnight at 4  $^{\circ}\text{C}$ . TEM imaging shows fibril formation with all multivalent arsenicals. Reduced RNase in absence of any arsenical does not show fibril like structures (panel D).

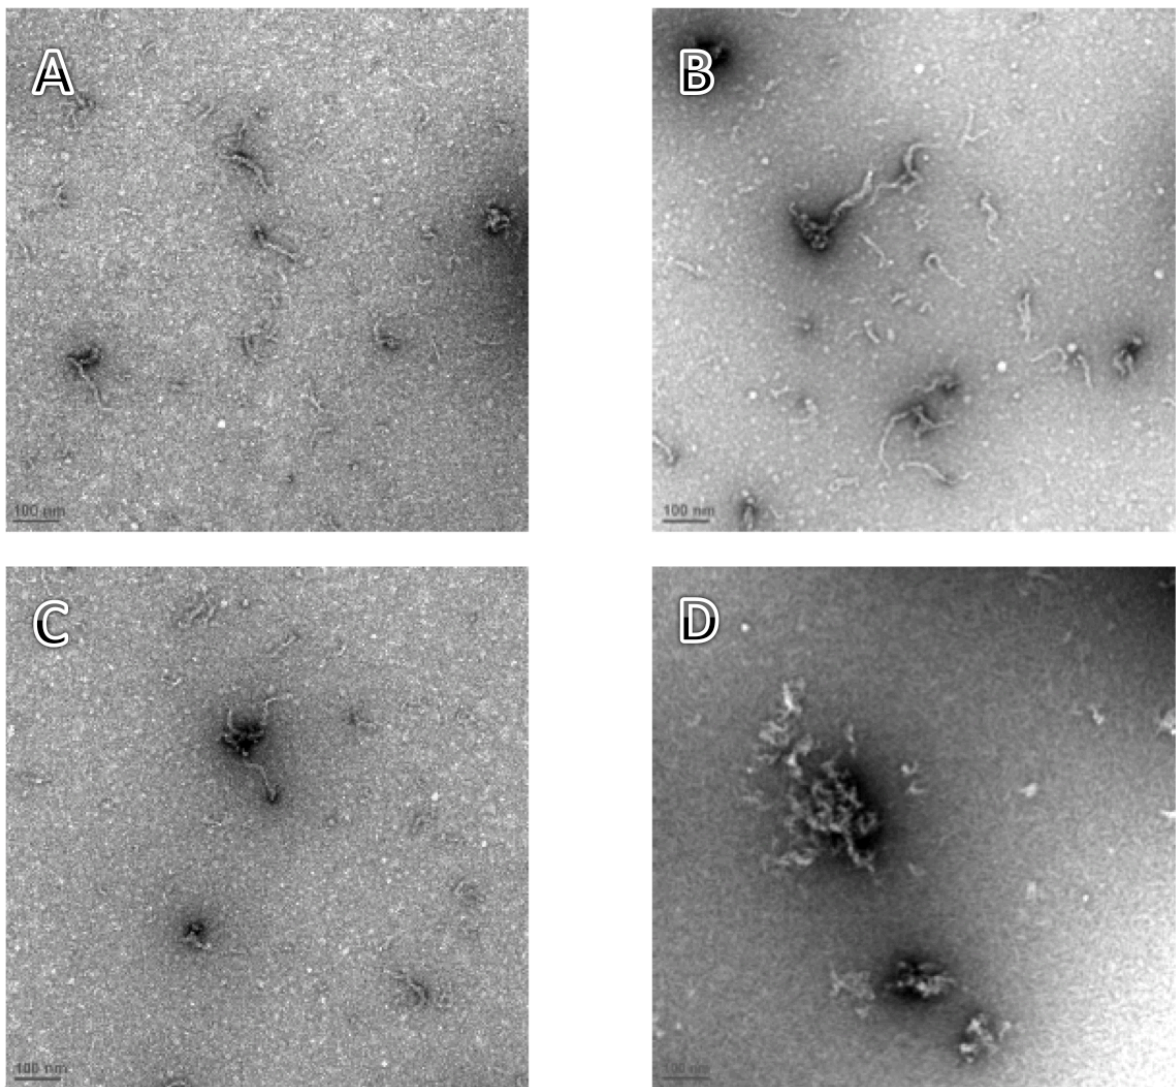

Supplement: bi501360e_si_001.pdf [file bi501360e_si_001.pdf]
